# Supplementary material
Source: PubMed Central journal article supplement (PMC5621909)
Supplement: jciinsight-2-94328-s001.pdf [file jciinsight-2-94328-s001.pdf]

**Supplementary Figure 1.** Comparison of longitudinal IgG antibody titers in CRIM-negative IPD patients treated with ERT+ITI versus treatment with ERT monotherapy

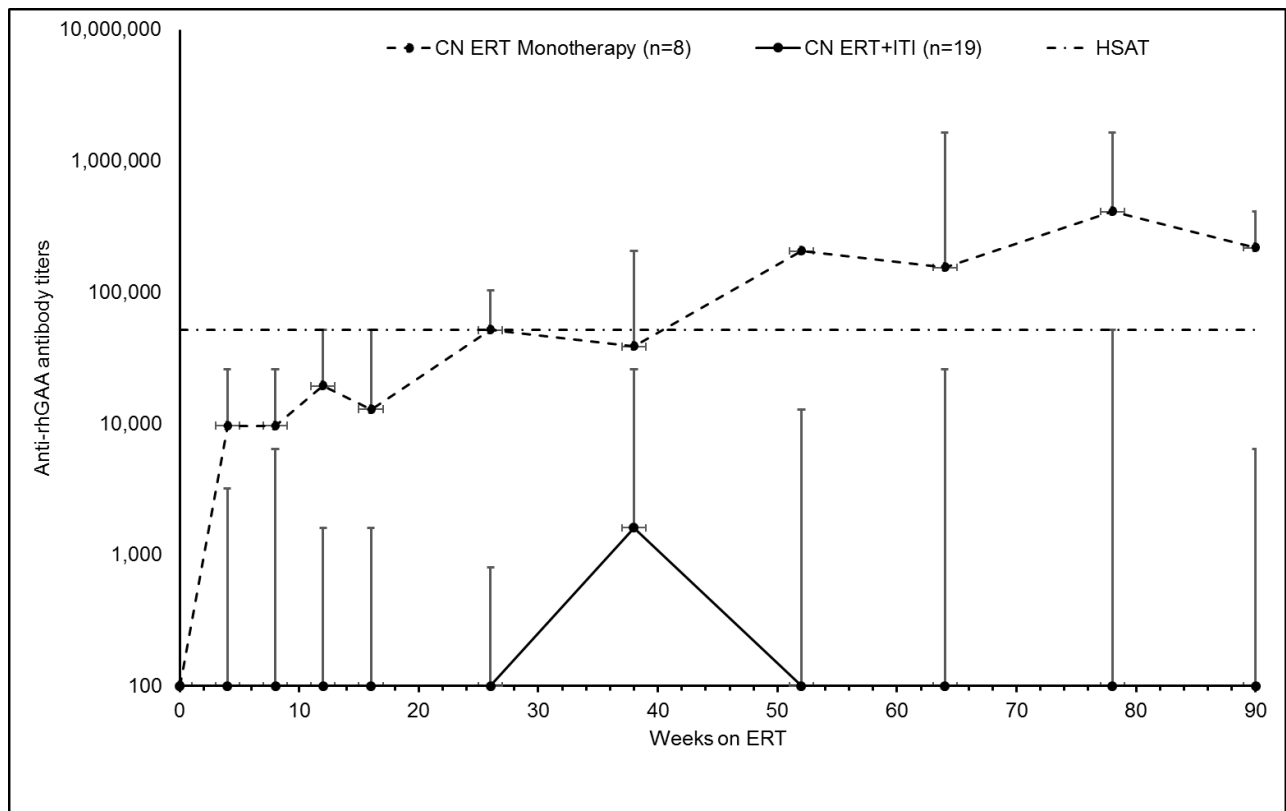

High and sustained rhGAA IgG antibody titers (HSAT) defined as titers of  $\geq 51,200$  at or beyond six months on ERT (shown by a horizontal dashed line).

**Supplementary Figure 2.** ITI treatment regimen which includes rituximab, methotrexate, and intravenous immunoglobulin (IVIg)

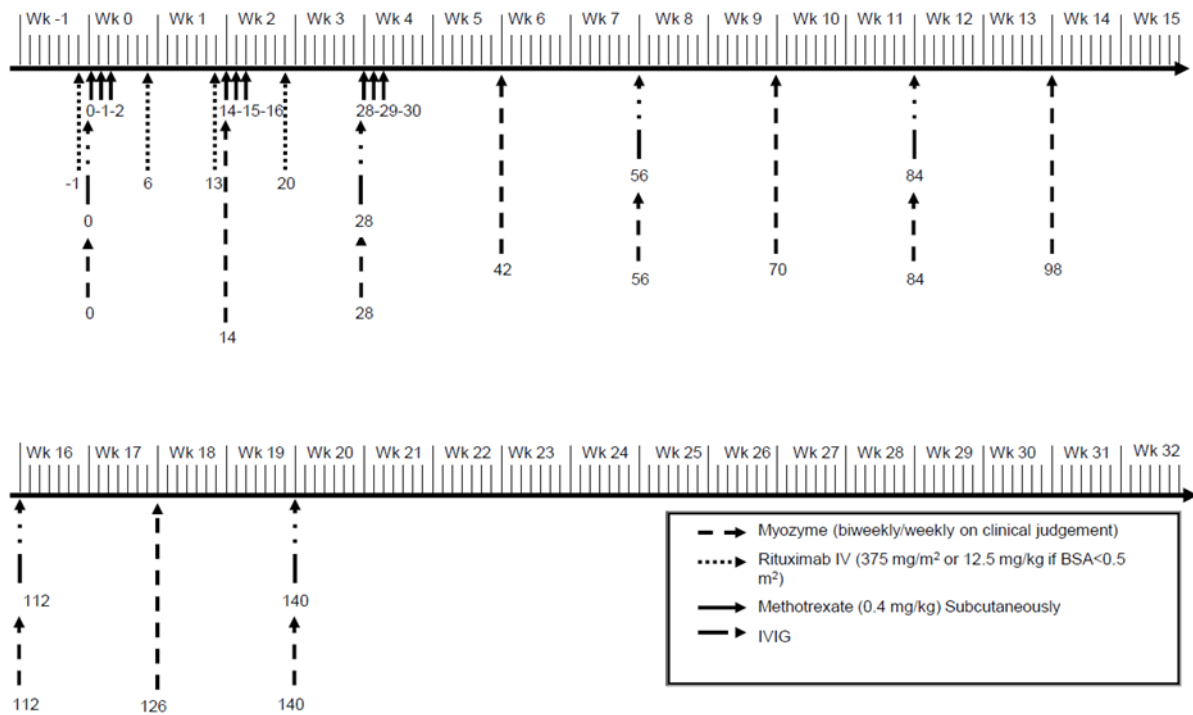

**Supplementary Table 1.** *GAA* variant data on CRIM-negative IPD patients on ERT+IT

| <b>CRIM-negative patients treated with ITI (alive at the time of database lock)</b> |                            |                            |                      |                      |
|-------------------------------------------------------------------------------------|----------------------------|----------------------------|----------------------|----------------------|
| <b>Pt.</b>                                                                          | <b><i>GAA</i> Allele 1</b> | <b><i>GAA</i> Allele 2</b> | <b>Allele 1 type</b> | <b>Allele 2 type</b> |
| 1                                                                                   | c.341insT                  | c.341insT                  | Frameshift           | Frameshift           |
| 3                                                                                   | c.2608C>T                  | c.2608C>T                  | Nonsense             | Nonsense             |
| 4                                                                                   | c.546+2T>C                 | c.546+2T>C                 | Splice site          | Splice site          |
| 5                                                                                   | c.236_246del               | c.236_246del               | Frameshift           | Frameshift           |
| 6                                                                                   | c.525delT                  | c.2560C>T                  | Frameshift           | Nonsense             |
| 10                                                                                  | c.2560C>T                  | c.1292_1295dupTGCA         | Nonsense             | Frameshift           |
| 11                                                                                  | c.2560C>T                  | c.2560C>T                  | Nonsense             | Nonsense             |
| 13                                                                                  | c.2560C>T                  | c.2560C>T                  | Nonsense             | Nonsense             |
| 14                                                                                  | c.258dupC                  | c.2227C>T                  | Frameshift           | Nonsense             |
| 15                                                                                  | c.1754+2T>A                | c.1822C>T                  | Splice site          | Nonsense             |
| 16                                                                                  | c.2237G>A                  | c.437delT                  | Nonsense             | Frameshift           |
| 17                                                                                  | c.2560C>T                  | c.2560C>T                  | Nonsense             | Nonsense             |
| 18                                                                                  | c.2560C>T                  | c.2560C>T                  | Nonsense             | Nonsense             |
| 19                                                                                  | c.2560C>T                  | c.525delT                  | Nonsense             | Frameshift           |
| <b>Deceased CRIM-negative patients treated with ITI</b>                             |                            |                            |                      |                      |
| <b>Pt.</b>                                                                          | <b><i>GAA</i> Allele 1</b> | <b><i>GAA</i> Allele 2</b> | <b>Allele 1 type</b> | <b>Allele 2 type</b> |
| 2                                                                                   | c.1548G>A                  | c.525delT                  | Nonsense             | Frameshift           |
| 7                                                                                   | c.2560C>T                  | c.2560C>T                  | Nonsense             | Nonsense             |
| 8                                                                                   | c.525_526delTG             | c.525_526delTG             | Frameshift           | Frameshift           |
| 9                                                                                   | c.2560C>T                  | c.2560C>T                  | Nonsense             | Nonsense             |
| 12                                                                                  | c.2560C>T                  | c.2560C>T                  | Nonsense             | Nonsense             |

**Supplementary Table 2.** Demographics and *GAA* variant data of CRIM-negative IPD patients treated with ERT monotherapy

| <b>Pt.</b> | <b>Gender</b> | <b>Race/Ethnicity</b> | <b>Age at initiation of ERT (months)</b> | <b><i>GAA</i> allele 1</b> | <b><i>GAA</i> allele 2</b> | <b>Allele 1 type</b> | <b>Allele 2 type</b> |
|------------|---------------|-----------------------|------------------------------------------|----------------------------|----------------------------|----------------------|----------------------|
| 1          | M             | Caucasian             | 4.2                                      | c.722_723delTT             | c.1687C>T                  | Frameshift           | Nonsense             |
| 2          | M             | African American      | 2.8                                      | c.2560C>T                  | c.2560C>T                  | Nonsense             | Nonsense             |
| 3          | M             | Asian                 | 4.8                                      | c.148_859_11del            | c.685_686insCGGC           | Frameshift           | Frameshift           |
| 4          | F             | Arab                  | 2.7                                      | c.2560C>T                  | c.2560C>T                  | Nonsense             | Nonsense             |
| 5          | F             | Caucasian             | 7.0                                      | c.1075G>T                  | c.1075G>T                  | Nonsense             | Nonsense             |
| 6          | F             | African American      | 2.3                                      | c.2560C>T                  | c.2560C>T                  | Nonsense             | Nonsense             |
| 7          | M             | African American      | 6.2                                      | c.2560C>T                  | c.2560C>T                  | Nonsense             | Nonsense             |
| 8          | F             | Caucasian             | 2.1                                      | c.722_723delTT             | c.1754 +1G>A               | Frameshift           | Splice site          |
| 9          | F             | Arabic                | 3.7                                      | c.1209delC                 | c.1209delC                 | Frameshift           | Frameshift           |
| 10         | M             | Hispanic              | 0.3                                      | c.1496G>A                  | c.1496G>A                  | Nonsense             | Nonsense             |
